# Supplementary material
Source: publisher figshare collection journal article supplement (https://frontiersin.figshare.com/ndownloader/files/17717615)
Supplement: Supplementary file 1 [file 17717615]

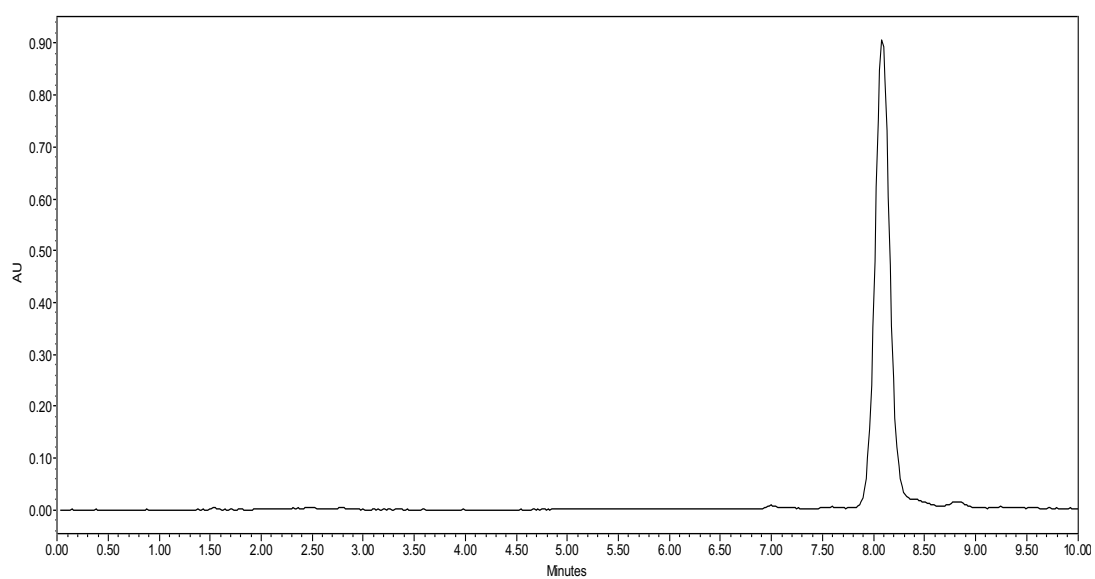

**Supplementary Figure 1.** Representative chromatographic profile of Eupalinolide J (EJ ) used in the present study. The purity of EJ was assessed by HPLC on a Kromasil 100-5-C18 column ( $4.6 \times 250$  mm,  $5\ \mu\text{m}$ ) eluted with methanol-water (55: 45) with a flow rate of 1.0 ml/min. Spectrophotometric revelation was at 220 nm.
